# Supplementary material for: Synthesis and properties of a high dielectric constant copolymer of a copper phthalocyanine oligomer grafted to amino-capped polyimide
Source: Royal Society of Chemistry journal article supplement (doi:10.1039/c7tc03169f), 2017-01-01
Supplement: c7tc03169f1.pdf [file c7tc03169f1.pdf]

## Electronic Supplementary Information

### Synthesis and Properties of A High Dielectric Constant Copolymer of Copper Phthalocyanine Oligomer Grafted to Amino-capped Polyimide

Linlin Chen, Yichun Ding\*, Ting Yang, Changfeng Wan and Haoqing Hou\*

Department of Chemistry and Chemical Engineering, Jiangxi Normal University, Nanchang, Jiangxi 330022, People's Republic of China.

\*Corresponding author: Tel: (+86)791-88120389; Fax: (+86)791-88120536; E-mail: [haqing@jxnu.edu.cn](mailto:haqing@jxnu.edu.cn) (H. Hou), [yichun.ding@mines.sdsmt.edu](mailto:yichun.ding@mines.sdsmt.edu) (Y. Ding).

## 1. Experimental

### 1.1 Materials

Pyromellitic dianhydride (PMDA), 3,3',4,4'-biphenyltetracarboxylic dianhydride (BPDA), and 4,4'-oxydianiline (ODA) were purchased from Changzhou Sunlight Pharmaceutical Co., Ltd. (Changzhou, China). N,N'-dimethylacetamide (DMAc), N-methyl pyrrolidone (NMP), nitrobenzene (PhNO<sub>2</sub>, AR), methanol (AR), and HCl (AR) were purchased from the Shanghai Chemical Reagents Co. (Shanghai, China). Urea (AR), CuSO<sub>4</sub> (CP), NH<sub>4</sub>Cl (CP), and (NH<sub>4</sub>)<sub>2</sub>MoO<sub>4</sub> (AR) were purchased from Sinopharm Chemical Reagent Co., Ltd. (Shanghai, China). NaOH (AR) and NaCl (AR) were purchased from Nanjing Chemical Reagents Co. (Nanjing, China). PMDA, BPDA, and ODA were purified using vacuum sublimation prior to use; PhNO<sub>2</sub> was pre-treated with anhydrous MgSO<sub>4</sub> prior to use; and other chemicals were used as received.

### 1.2 Synthesis of copper phthalocyanine anhydride oligomer (o-CuPcA)

**o-CuPc synthesis:** The copper phthalocyanine oligomer (o-CuPc) (**Figure S1**) was synthesized by a solution method following a previously reported procedure.<sup>1, 2</sup> Specifically, CuSO<sub>4</sub> (3.9 g), urea (30 g), PMDA (9.6 g), NH<sub>4</sub>Cl (2.5 g), and (NH<sub>4</sub>)<sub>2</sub>MoO<sub>4</sub> (0.5 g) were mixed together and finely ground, and then transferred to a 250 mL three-necked flask equipped with a thermometer, condenser, and mechanical stirrer. Subsequently, 25 mL PhNO<sub>2</sub> was added into the flask and the flask was then gradually heated to 180 °C and held for at least 12 h. During the reaction, the color of the solution gradually becomes dark blue, and the dark-blue solid material was precipitated in the flask, which is the formed o-CuPc. Please note that during the reaction, a large amount of white crystalline solid is formed in the condenser, which is caused by the sublimation of ammonium salt under high temperature. Therefore, the condenser should be paid attention to remove the white solid in time to avoid explosion. Thereafter, the resulting solid product was treated with the following procedure to give the final product: 1) washed with methanol and filtered; 2) boiled with 2 N HCl (saturated with NaCl), then cool to room temperature and filtered; 3) boiled with 2 N NaOH (saturated with NaCl) until all the ammonia was evaporated, and then cool to room

temperature and filtered; 4) treated with 2 N HCl and filtered; 5) dissolved in 2 N NaOH and filtered to separate the insoluble components; 6) the above solution was precipitated with 2 N HCl and filtered; 7) the solid was washed with DI water until it was neutral; 8) dried in a vacuum oven, room temperature. **Figure S2a** shows the chemical synthesis.

***o-CuPcA synthesis:*** The as-synthesized o-CuPc was heat treated to dehydration to form copper phthalocyanine anhydride oligomer (o-CuPcA). In detail, the obtained o-CuPc powder was heated in a vacuum oven under 200 °C overnight (~10 h), and then cool down to room temperature in the vacuum oven. **Figure S2b** shows the conversion from o-CuPc to o-CuPcA.

### ***1.3 Preparation of CuPc-PI film***

***Synthesis of amino-capped polyamic acid (PAA):*** The precursor of PI (PAA) was synthesized by polycondensation of BPDA and ODA at a low temperature (0~5 °C), and the molar ratio of BPDA and ODA was 0.95:1 to obtain a 20 wt% amino-capped PAA solution. **Figure S7** shows the chemical synthesis.

***Preparation of CuPc-PI film:*** The o-CuPcA was dispersed in NMP by ultra-sonication for 3 h until a stable suspension was formed. Then, pre-calculated amount of PAA solution and o-CuPcA dispersion were added together in a dry flask equipped with a mechanical stirrer, followed by vigorously stirring for 1 h at room temperature. o-CuPcA-PAA solutions with the o-CuPcA content of 10 wt%, 20 wt%, 30 wt%, 40 wt%, and 50 wt% were prepared. Subsequently, the resulting o-CuPcA-PAA solutions were cast onto clean glass slides to obtain smooth and uniform films. The films were then dried in a vacuum oven at 60 °C for 12 h to completely remove the residual solvent. The thermal imidization process is performed as follows: 1) heating to 120 °C with the heating rate of 5 °C/min (in nitrogen) and annealing for 1h; 2) heating to target temperature (240, 270, 300, 330, 350, and 380 °C) with the heating rate of 2 °C/min (in nitrogen) and annealing for 1h.

### ***1.4 Characterization***

Scanning Electron Microscope (SEM, TESCAN vega3) was employed to observe the morphology of the o-CuPcA and CuPc-PI films, and SEM-EDS analysis was used to analyze the element information. The chemical structures were studied by using Fourier transform infrared spectroscopy (FT-IR, Bruker tensor 27) and UV-vis (U-3310, Hitachi). Dielectric properties were measured using a TH2819-A precision LCR meter (Tong hui Electronic Co., Ltd) at a frequency range from 100 Hz to 100 kHz. The dielectric breakdown strength of the films was performed on the electric breakdown strength test machine (KP8048, Dongguan, China). Thermal Gravimetric Analysis (TGA) was carried out on a thermogravimetric analyzer (WRT-3P, Shanghai, China) with the heating rate of 10 °C/min in N<sub>2</sub>. Tensile test is carried out using CMT-8102 electromechanical testing machine (Shenzhen, China) with stretching rate of 5 mm/min. The thickness of the samples was measured by screw micrometer.

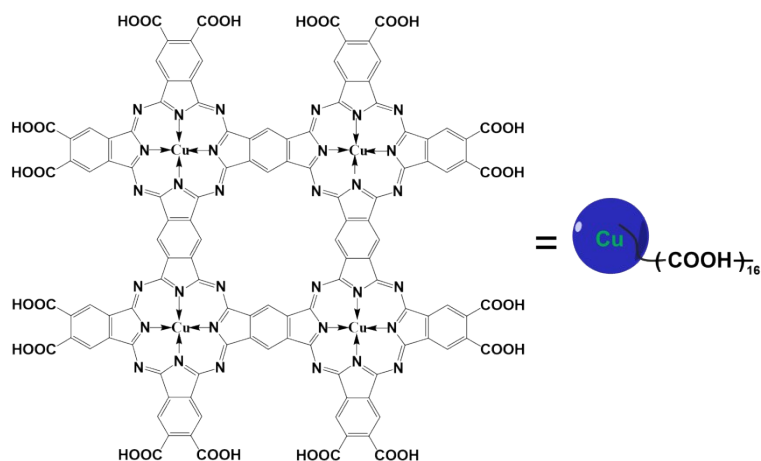

**Figure S1** The chemical structure of copper phthalocyanine oligomer (o-CuPc).

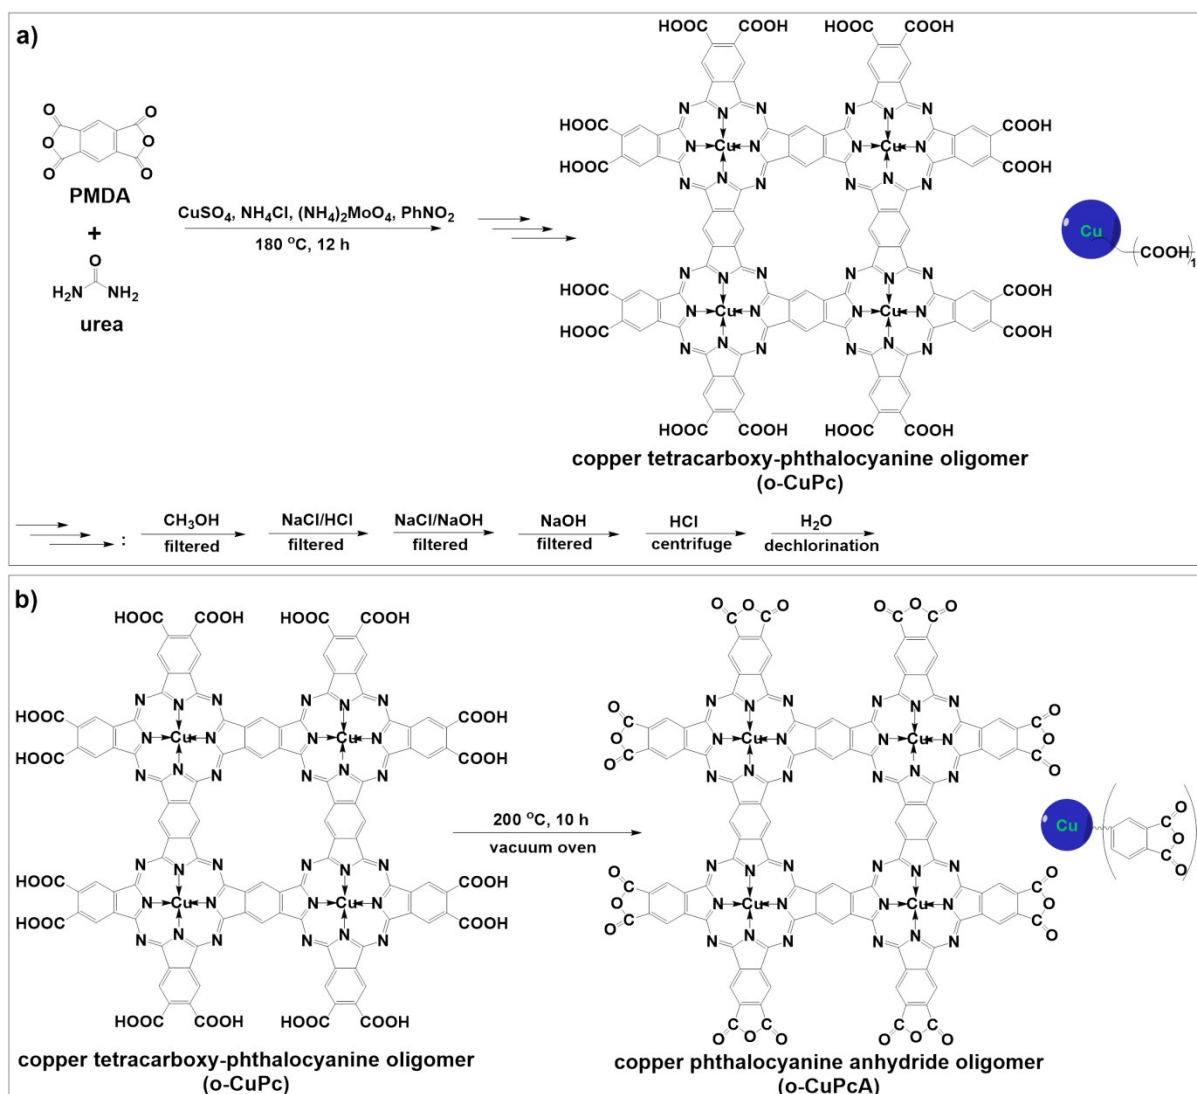

**Figure S2 a)** Synthesis of o-CuPc, **b)** conversion of o-CuPc to copper phthalocyanine anhydride oligomer (o-CuPcA) by thermal dehydration.

## 2. Results and Discussion

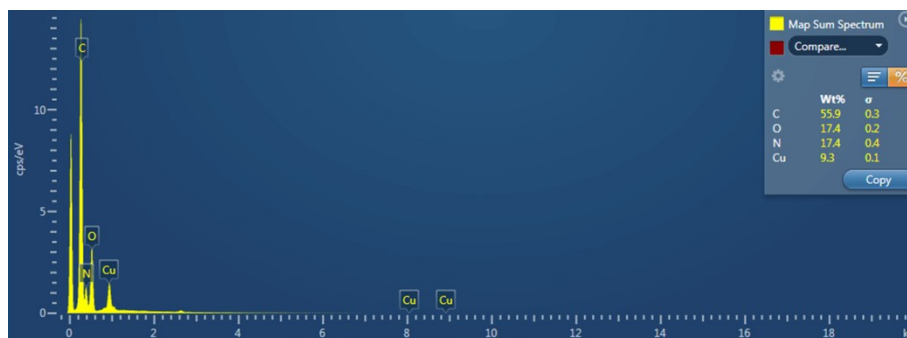

**Figure S3** SEM-EDS element analysis of the synthesized o-CuPcA.

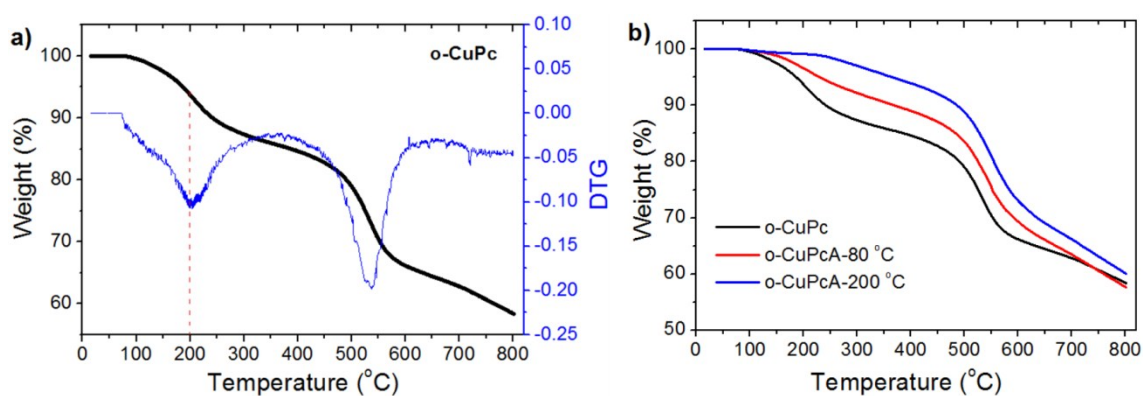

**Figure S4** a) TGA and DTG curves of the synthesized o-CuPc; b) TGA curves of the o-CuPc, and o-CuPc treated at 80 °C (o-CuPcA-80) and 200 °C (o-CuPcA-200).

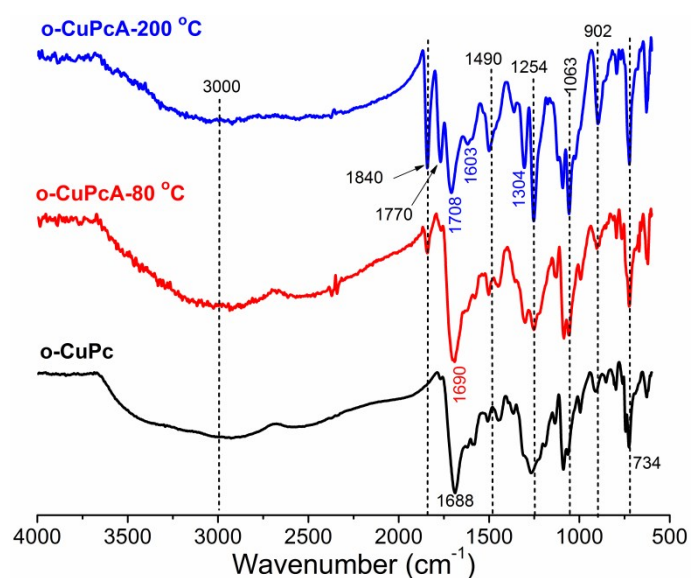

**Figure S5** FT-IR spectrum of the synthesized o-CuPc, and o-CuPc treated at 80 °C (o-CuPcA-80) and 200 °C (o-CuPcA-200).

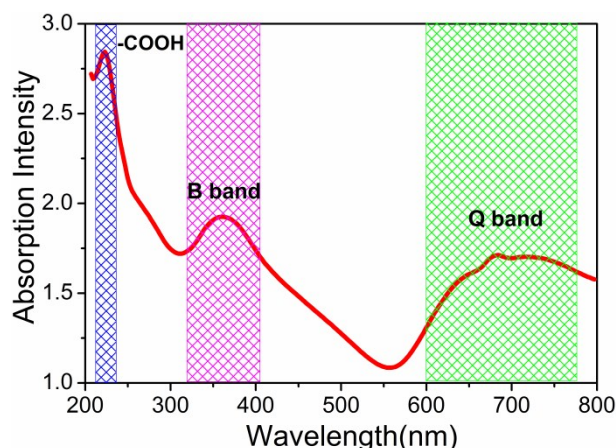

**Figure S6** UV-vis spectrum of the synthesized o-CuPcA.

## 2.1 Characterization of as-synthesized o-CuPcA

The o-CuPc is a carboxylic-capped oligomeric molecule containing a rich ortho-dicarboxylic acid group, in which the ortho-dicarboxylic acid can be converted into dianhydride group through thermal dehydration to give the copper phthalocyanine anhydride oligomer (o-CuPcA). **Figure S4a** shows the TGA and DTG curves of the synthesized o-CuPc, it can be seen that the on-set weight loss temperature is about 80 °C, and the DTG peak temperature is about 200 °C. Those weight losses should be attributed to the dehydration. Therefore, we have investigated the conversion of o-CuPc to o-CuPcA at the heat treatment temperature of 80 and 200 °C (in vacuum, 10 h). **Figure S4b** shows the TGA curves of original o-CuPc, and o-CuPc treated at 80 °C (o-CuPcA-80) and 200 °C (o-CuPcA-200), it is obvious that the o-CuPcA-80 still has a significant weight loss above 150 °C, indicating that there are still carboxylic acid groups in the o-CuPcA-80 and can be further dehydrated; while the o-CuPcA-200 shows negligible weight loss until 250 °C, indicating most dicarboxylic acid groups should be converted to dianhydride groups. The further weight loss above 250 °C might be attributed to the dehydration of some residual carboxylic acid groups and the decomposition of the molecule skeleton. The 5% weight loss temperature of the o-CuPcA-200 is about 352 °C, showing good thermal stability. In the following preparation of CuPc-PI, the o-CuPcA-200 was used.

The chemical structure was investigated by using FT-IR, and **Figure S5** shows the FT-IR spectrum of the o-CuPc, o-CuPcA-80, and o-CuPcA-200. In the spectrum of o-CuPc, the broad peak around 3000  $\text{cm}^{-1}$  corresponds to the stretching vibration of -OH, the strong absorption band at 1688  $\text{cm}^{-1}$  corresponds to the stretching vibration of carbonyl group of -COOH, the absorption peaks at 1603, 1490, 1304, and 1254  $\text{cm}^{-1}$  correspond to the heteroaromatic skeleton (-C-N, -C=N, and C=C), and the absorption peaks at 902 and 734  $\text{cm}^{-1}$  correspond to the phthalocyanine skeleton.<sup>2, 3</sup> The above absorptions should demonstrate the formation of o-CuPc. After heat treatment at 80 °C, a weak peak appeared at 1840  $\text{cm}^{-1}$ , which corresponds to the asymmetric stretching of carbonyl group of anhydride, indicating the formation of dianhydride. After heat treatment at 200 °C, the absorptions of

heteroaromatic skeleton and phthalocyanine skeleton were maintained. In addition, two strong peaks appeared at 1840 and 1770  $\text{cm}^{-1}$ , which correspond to the asymmetric stretching and symmetric stretching of carbonyl group of anhydride; and a strong peak at 1063  $\text{cm}^{-1}$ , which corresponds to the stretching vibration of C-O in anhydride. In addition, there was still a broad peak near 3000  $\text{cm}^{-1}$ , and the peak at 1688  $\text{cm}^{-1}$  shifted to 1708  $\text{cm}^{-1}$ , indicating the presence of some unreacted  $-\text{COOH}$  in o-CuPcA-200.

Moreover, the chemical structure of o-CuPcA was further confirmed by UV-vis. In general, there are two characteristic peaks in the o-CuPc: one absorption in the UV region ( $\sim 200\text{-}300$  nm) which known as the Soret (B) band, and another broad absorption in the visible region ( $\sim 550\text{-}750$  nm) which known as the Q band.<sup>3</sup> The B band is equivalent to the  $\gamma$  or Soret band in porphyrins, and the Q band is equivalent to  $\alpha$  band in porphyrins. The B band and Q band are attributed to the  $n\text{-}\pi^*$  transition and  $\pi\text{-}\pi^*$  transition on the phthalocyanine, respectively.<sup>4</sup> As shown in **Figure S6**, those two peaks are observed in the o-CuPcA-200. In addition, there is another peak appearing at 220-230 nm, which corresponds to the absorption of  $-\text{COOH}$ .

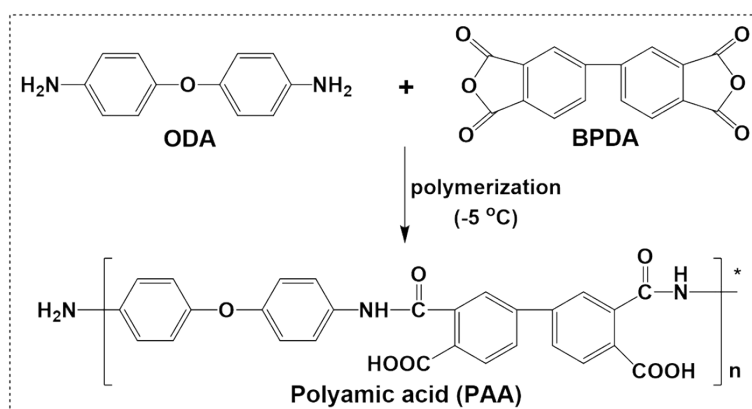

**Figure S7** Synthesis of amino-capped polyamic acid (PAA) by the polycondensation between ODA and BPDA.

## 2.2 Thermal imidization investigation (Chemical structure of CuPc-PI)

The conversion from o-CuPcA-PAA to CuPc-PI by thermal treatment is confirmed by FT-IR. As shown in **Figure 8**, the amino-capped PAA shows the characteristic absorptions at 1710, 1603 and 1546  $\text{cm}^{-1}$ , which correspond to the  $-\text{C}=\text{O}$  stretching in  $-\text{COOH}$  group,  $-\text{C}=\text{O}$  stretching in  $-\text{CONH}$  group, and  $-\text{NH}$  stretching in  $-\text{CONH}$  group, respectively; the peak at 1490  $\text{cm}^{-1}$  corresponds to the C-N stretching, and wide weak peak around 3000 $\sim$ 3500  $\text{cm}^{-1}$  corresponds to absorption of  $-\text{NH}-$  and  $-\text{OH}$  groups, and the absorptions at 1406 and 1217  $\text{cm}^{-1}$  correspond to  $-\text{OH}$  stretching. For the o-CuPcA-PAA, it not only has the characteristic absorptions of both PAA and o-CuPcA, but also appears significant absorptions near 3340



and 2976  $\text{cm}^{-1}$ , which should be attributed to the rich-COOH groups after the reaction of o-CuPcA and amino capped PAA. After heat treatment (thermal imidization), the CuPc-PI shows the characteristic absorptions of PI, peaks at 1780  $\text{cm}^{-1}$  ( $-\text{C}=\text{O}$  in imide, asymmetric stretching), 1708  $\text{cm}^{-1}$  ( $-\text{C}=\text{O}$  in imide, symmetric stretching), 1370  $\text{cm}^{-1}$  (C-N stretching), and 1217 and 1063  $\text{cm}^{-1}$  (C-O-C stretching).<sup>5-7</sup> The peak at 734  $\text{cm}^{-1}$  is contributed to the deformation of imide ring or imide carbonyl groups,<sup>5</sup> and the peaks at 1603 and 1490  $\text{cm}^{-1}$  are correspond to the heteroaromatic skeleton structure ( $-\text{C}-\text{N}$ ,  $-\text{C}=\text{N}$ , and  $\text{C}=\text{C}$ )<sup>2</sup> in CuPc or PI component.

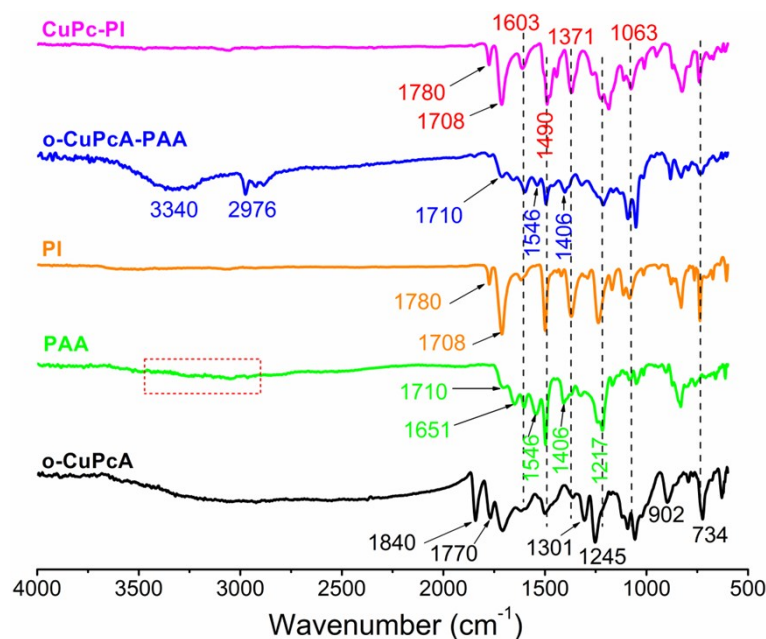

**Figure S8** FT-IR spectrum of o-CuPcA, PAA, PI (thermal imidization temperature: 300 °C), o-CuPcA-PAA, and CuPc-PI (thermal imidization temperature: 300 °C).

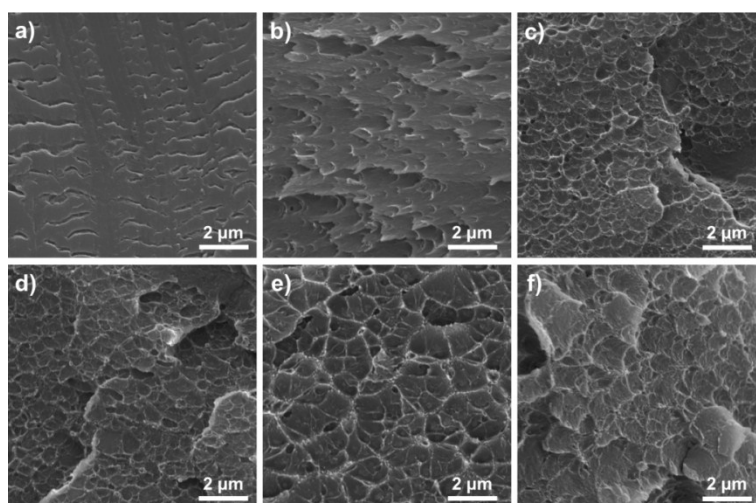

**Figure S9** SEM images of neat PI (a), and CuPc-PI film with the o-CuPcA content of 10 wt% (b), 20 wt% (c), 30 wt% (d), 40 wt% (e), and 50 wt% (f).

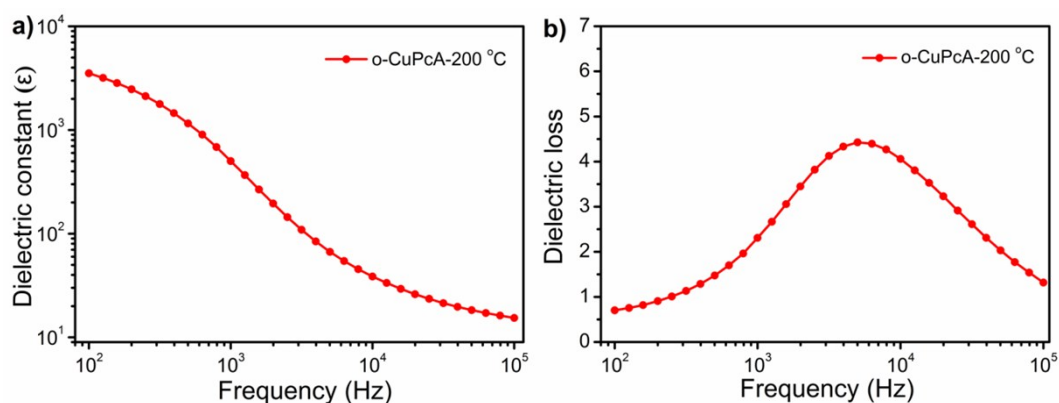

**Figure S10** Frequency dependent **a)** dielectric constant and **b)** dielectric loss of the synthesized o-CuPcA.

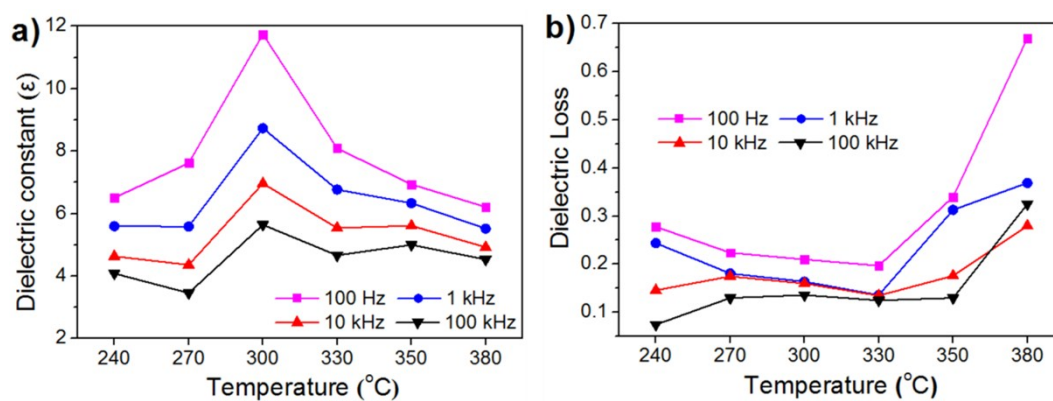

**Figure S11** Dependence of **a)** dielectric constant and **b)** dielectric loss of the CuPc-PI film (20 wt%) on thermal imidization temperature, measured at 100 Hz, 1 kHz, 10 kHz and 100 kHz.

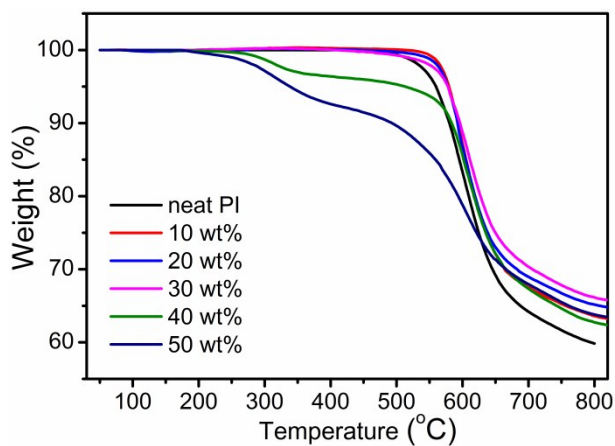

**Figure S12** TGA curves of neat PI and the prepared CuPc-PI films with different content of o-CuPcA.



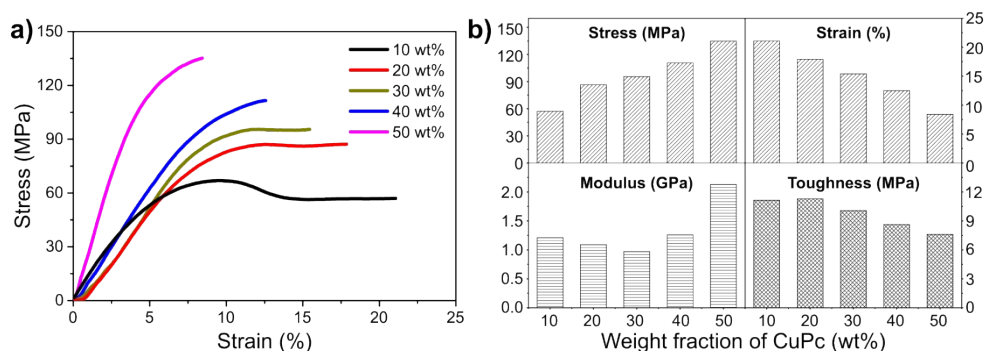

**Figure S13 a)** Typical stress-strain curves of the CuPc-PI films; **b)** Histogram comparison of the tensile stress, strain, elastic modulus, and toughness of the CuPc-PI films.

### 2.3 Thermal and mechanical property of CuPc-PI film

Good thermal stability and mechanical properties are essential for the practical application of modern flexible electronics. In this work, the prepared CuPc-PI films present an excellent thermal stability with the 5% weight loss temperature ( $T_{5\%}$ ) of CuPc-PI (10-40 wt%) higher than 500 °C (see TGA curves shown in **Figure 12**), which is comparable to those polyimide dielectric composites using inorganic fillers.<sup>8-10</sup> When the content of o-CuPcA is 10-30 wt%, the 5% weight loss temperatures of the CuPc-PI films are higher than that of neat PI, which are about 580 °C. The increase is because the synthesized CuPc-PI copolymer is a highly crosslinked polymer, that it has a higher molecular weight than both oligomers and the CuPc components should be encapsulated by polyimide molecules when at a low content CuPc. When at a higher content of o-CuPcA (40-50 wt%), the  $T_{5\%}$  is decreased to about 513 and 340 °C, respectively. The reason should be that the CuPc component is decomposed first when at a high content, since the CuPc has a relative low decompose temperature (~350 °C, Figure S4b). **Figure 13a** shows the typical stress-strain curves of the CuPc-PI films. It can be seen that the tensile stress of CuPc-PI increases with the increase of o-CuPcA, which is different with the decrease of mechanical strength for conventional dielectric composites using inorganic fillers.<sup>8-10</sup> The improved mechanical strength is attributed to the high molecular weight of CuPc-PI copolymer and the increased crosslinking degree. On the other hand, the tensile strain of CuPc-PI copolymer decreases with the increase of o-CuPcA content, attributing to the increased rigidity because of the highly crosslinked structure. The histogram comparison of tensile stress, strain, modulus, and toughness of the CuPc-PI films are displayed in **Figure 13b**.

**Table S1** Dielectric constant (@ 1kHz), electrical breakdown strength, and the maximum energy storage density of the CuPc-PI films

| Sample  | Dielectric constant<br>(1 kHz) | Breakdown strength<br>(kV/mm) | Maximum energy density<br>(J/cm <sup>3</sup> ) |
|---------|--------------------------------|-------------------------------|------------------------------------------------|
| neat PI | 3.55                           | 139.6                         | 0.306                                          |
| 10 wt%  | 5.52                           | 127.5                         | 0.397                                          |
| 20 wt%  | 8.74                           | 114.3                         | 0.505                                          |
| 30 wt%  | 13.10                          | 97.4                          | 0.550                                          |
| 40 wt%  | 17.75                          | 78.9                          | 0.489                                          |
| 50 wt%  | 24.10                          | 64.8                          | 0.448                                          |

**Movie S1.** A video showing a bending test of bending the CuPc-PI (50 wt%) up to ~100 cycles to demonstrate the mechanical flexibility.

## References

1. B. N. Achar, G. M. Fohlen and J. A. Parker, *Journal of Polymer Science: Polymer Chemistry Edition*, 1982, **20**, 1785-1790.
2. C. Huang and Q. M. Zhang, *Advanced Materials*, 2005, **17**, 1153-1158.
3. A. A. M. Farag, *Optics & Laser Technology*, 2007, **39**, 728-732.
4. J. S. S. SIVAMALAR, PON KALUGASALAM, *Chalcogenide Letters* 2012, **9**, 287-297.
5. C. A. Pryde, *Journal of Polymer Science Part A: Polymer Chemistry*, 1989, **27**, 711-724.
6. X. Wang, Y.-F. Li, T. Ma, S. Zhang and C. Gong, *Polymer*, 2006, **47**, 3774-3783.
7. S. Diaham, M. L. Locatelli and R. Khazaka, in *High performance polymers - Polyimides based - From chemistry to applications*, ed. M. J. M. Abadie, InTech, Rijeka, 2012, DOI: 10.5772/53994, p. Ch. 02.
8. W. Xu, Y. Ding, S. Jiang, W. Ye, X. Liao and H. Hou, *Polymer Composites*, 2016, **37**, 794-801.
9. Y. Ding, Q. Wu, D. Zhao, W. Ye, M. Hanif and H. Hou, *European Polymer Journal*, 2013, **49**, 2567-2571.
10. W. Xu, Y. Ding, S. Jiang, J. Zhu, W. Ye, Y. Shen and H. Hou, *European Polymer Journal*, 2014, **59**, 129-135.
